# Supplementary material
Source: PubMed Central journal article supplement (PMC2544572)
Supplement: 0806726105_0806726105SI.pdf [file 0806726105_0806726105SI.pdf]

# Supporting Information

Samanta *et al.* 10.1073/pnas.0806726105

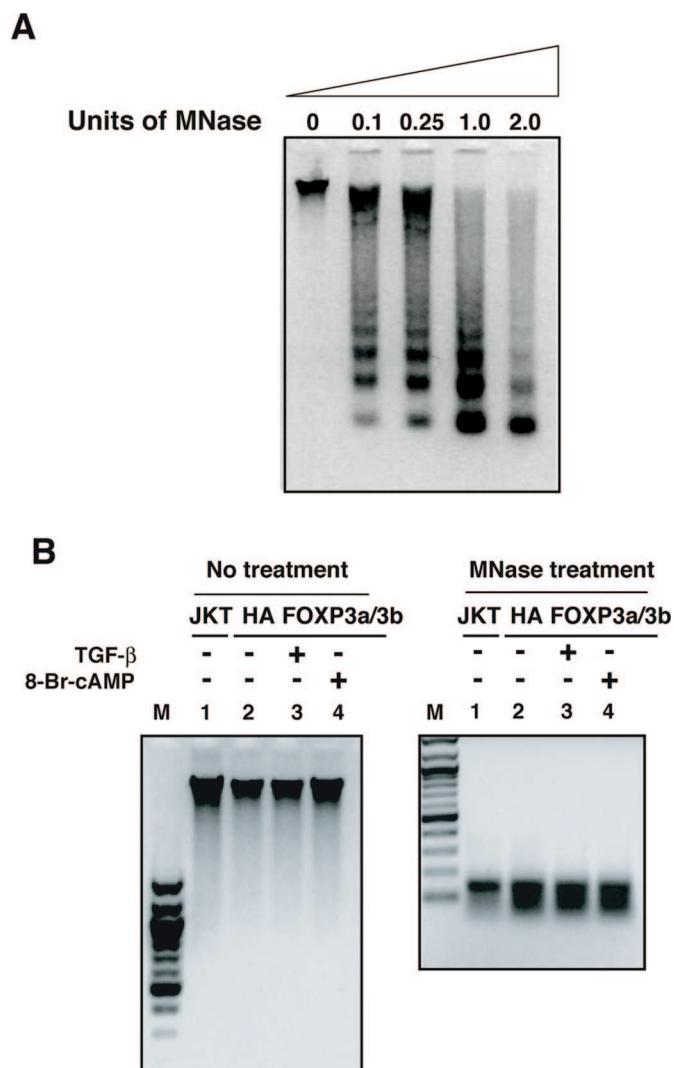

**Fig. S1.** Chromatin fraction contains DNA that can be digested by MNase treatment. (A) Nuclei from 10 million Treg cells were digested with the indicated amounts of MNase. Genomic DNA was isolated and separated by agarose gel electrophoresis (lanes 1, 2, 3, and 4). (B) Genomic DNA was isolated from MNase (10 U) treated supernatant or from untreated nuclei, and 2  $\mu$ g of genomic DNA was analyzed as in A. Lane M was loaded with a 1-kb DNA ladder (NEB N3232S).

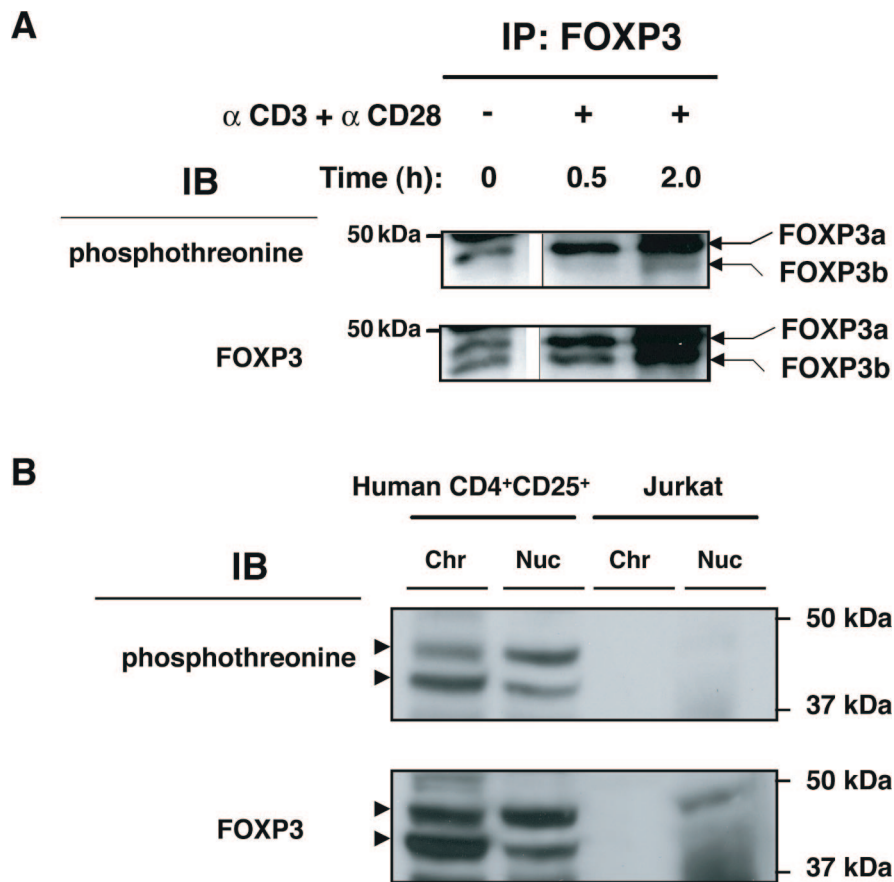

**Fig. S2.** Stimulation-dependent phosphorylation of FOXP3 in human Treg cells. (A) Expanded human CD4<sup>+</sup>CD25<sup>+</sup> Treg cells were serum starved, followed by treatment with plate-bound anti-CD3 (5.0  $\mu$ g/ml) and anti-CD28 (2.5  $\mu$ g/ml) for the indicated times. Nuclear extracts were immunoprecipitated with anti-FOXP3 mAb hFOXY, immunoblotted with anti-phosphothreonine, and then stripped and reprobbed with anti-FOXP3 mAb 221D. (B) Nuclear extracts (Nuc) and chromatin (Chr) fractions from Jurkat T cells or expanded human CD4<sup>+</sup>CD25<sup>+</sup> Treg cells were immunoblotted with anti-phosphothreonine and then stripped and reprobbed with anti-FOXP3 mAb 221D.
